# Supplementary material
Source: bioRxiv or medRxiv preprint supplement (https://medrxiv.org/content/medrxiv/early/2021/09/27/2021.09.24.21263664/DC1/embed/media-1.pdf)
Supplement: Supplementary file [file media-1.pdf]

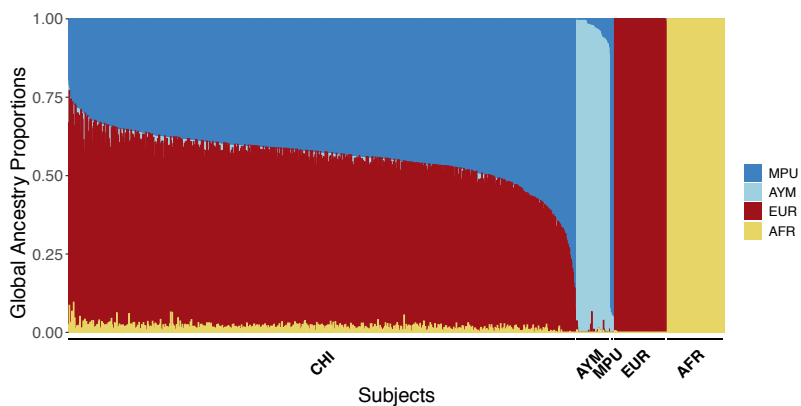

**S1 Fig.**

**Global ancestry proportions of Chilean children.** AFR: African; AYM: Aymara; CHL: Chilean; EUR: European; MPU: Mapuche.

474

475

476

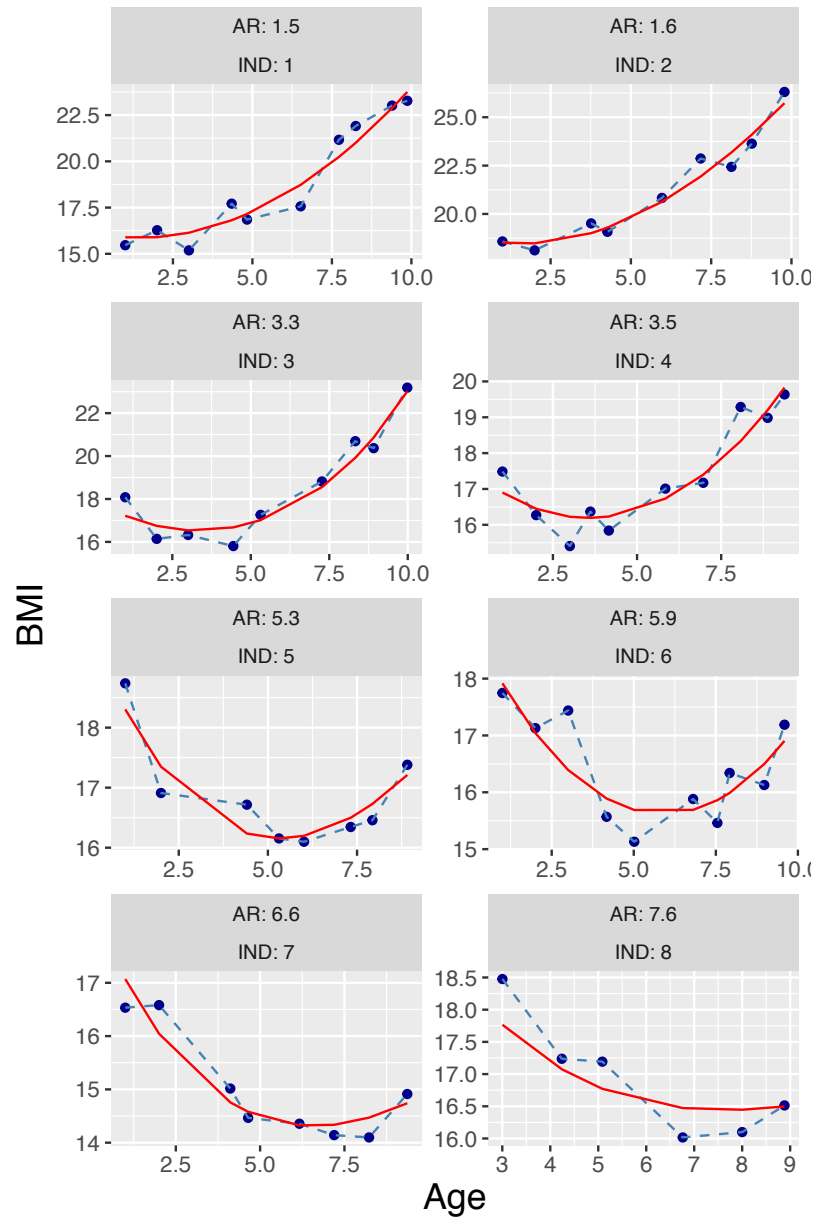

**S2 Fig.**  
**Individual estimations of Age-AR and BMI-AR.** Shown are examples of BMI trajectories for individuals with Age-AR estimations between 1.5 and 7.6 years old. Individual (IND) codes do not represent the original codes due to ethical reasons. Age-AR: Age at adiposity rebound.

477  
 478  
 479  
 480  
 481

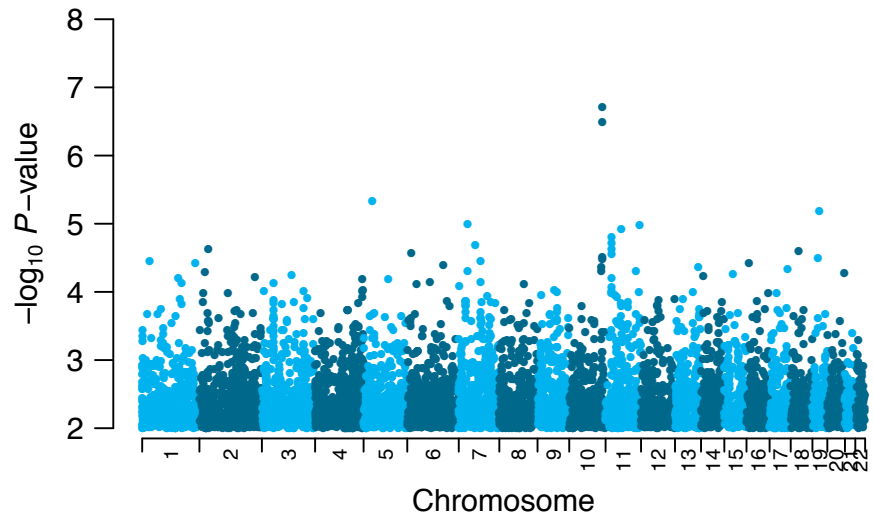

GWAS of BMI in children aged 0.5-1.5 years old.

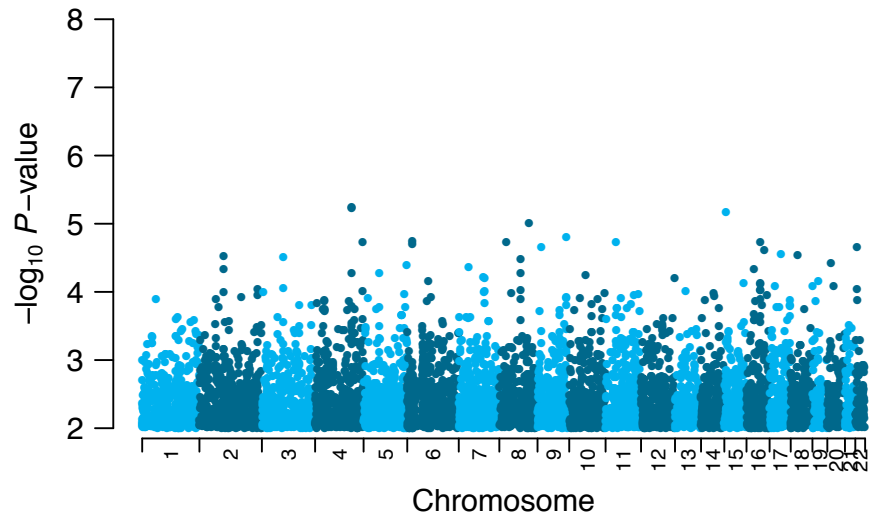

GWAS of BMI in children aged 2.5-3.5 years old.

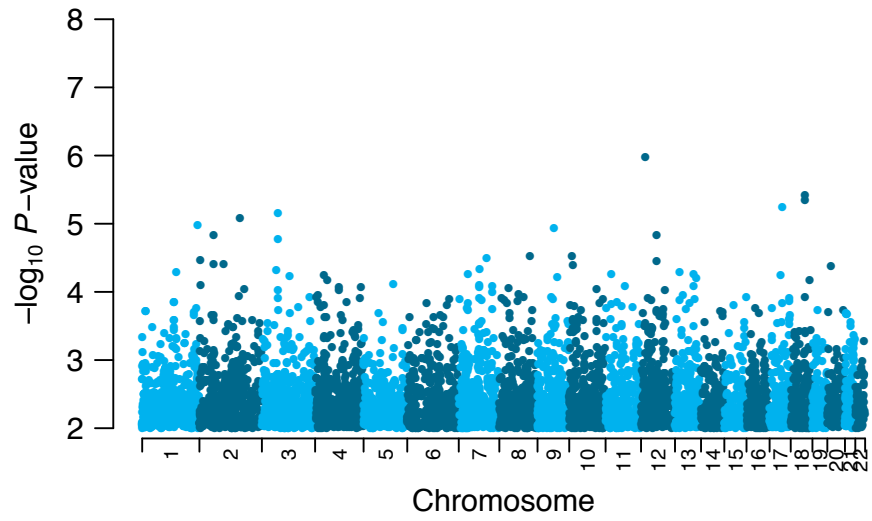

GWAS of BMI in children aged 3.5-4.5 years old.

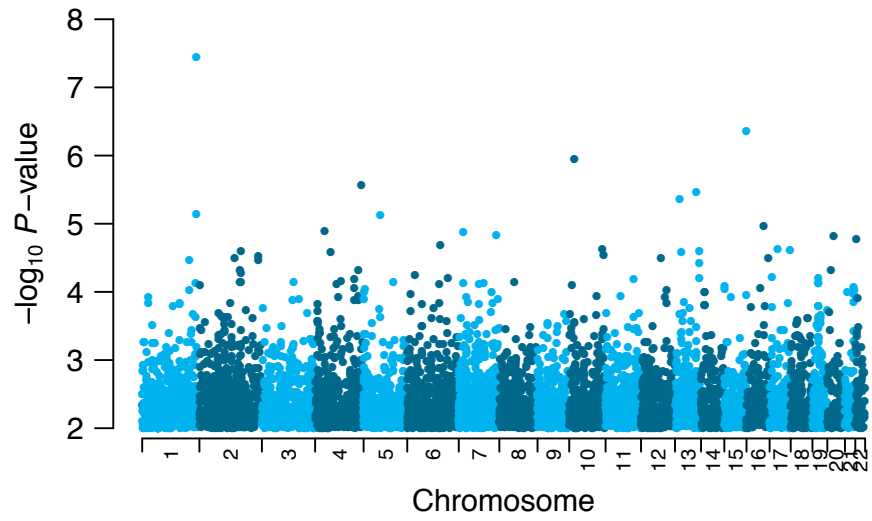

GWAS of BMI in children aged 4.5-5.5 years old.

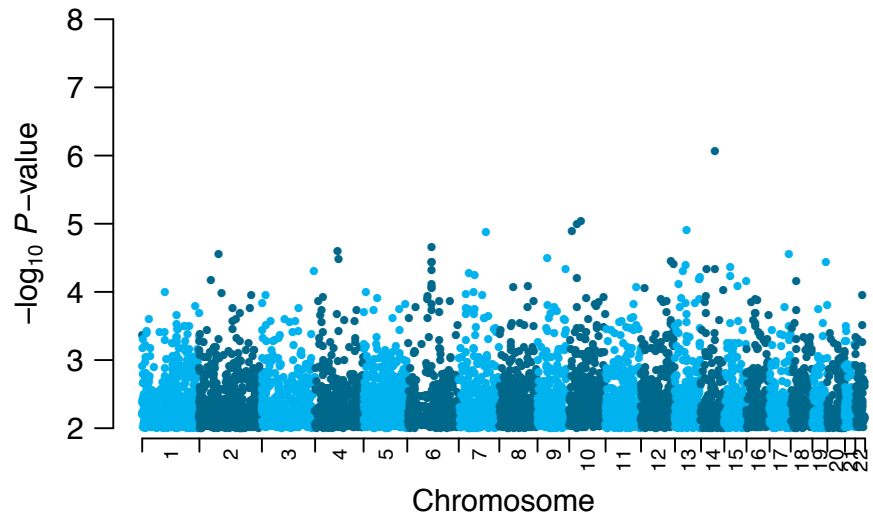

GWAS of BMI in children aged 5.5-6.5 years old.

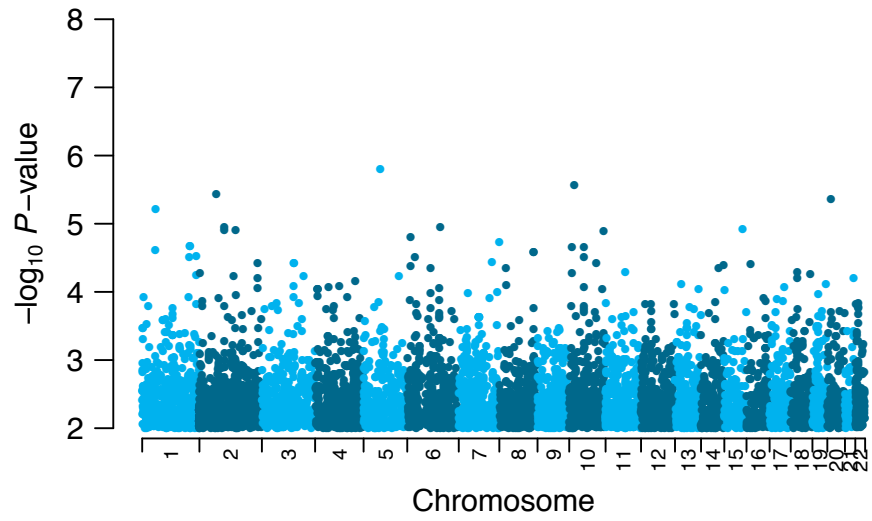

GWAS of BMI in children aged 6.5-7.5 years old.



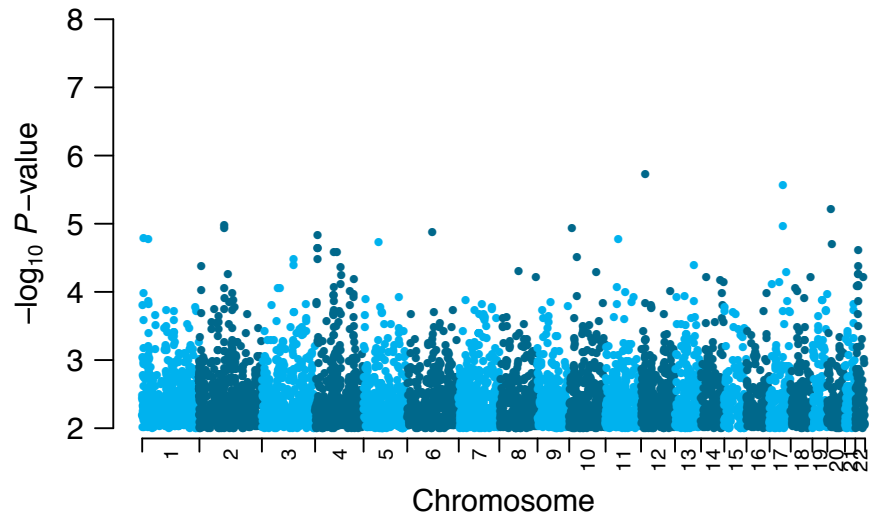

GWAS of BMI in children aged 7.5-8.5 years old.

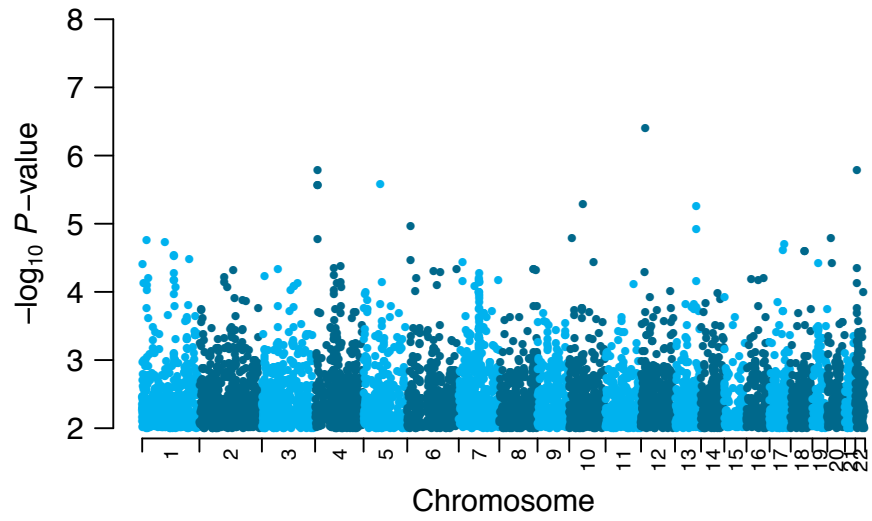

GWAS of BMI in children aged 8.5-9.5 years old.

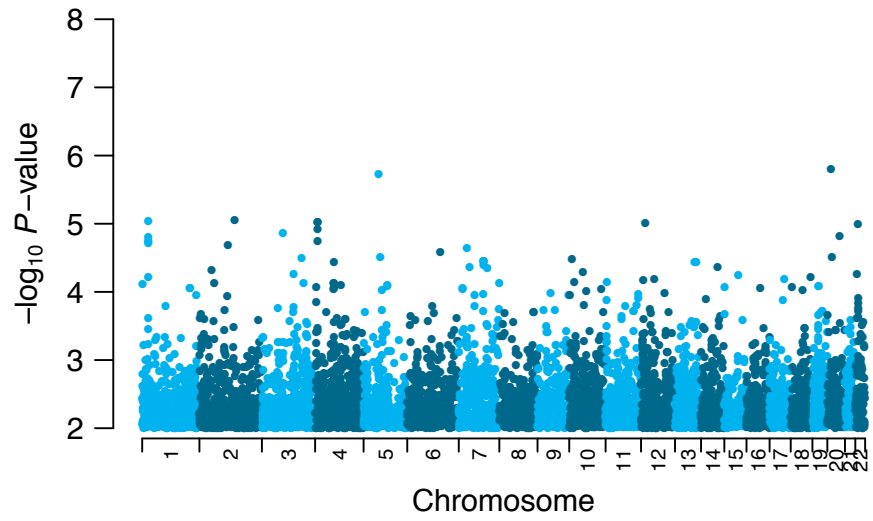

GWAS of BMI in children aged 9.5-10.5 years old.

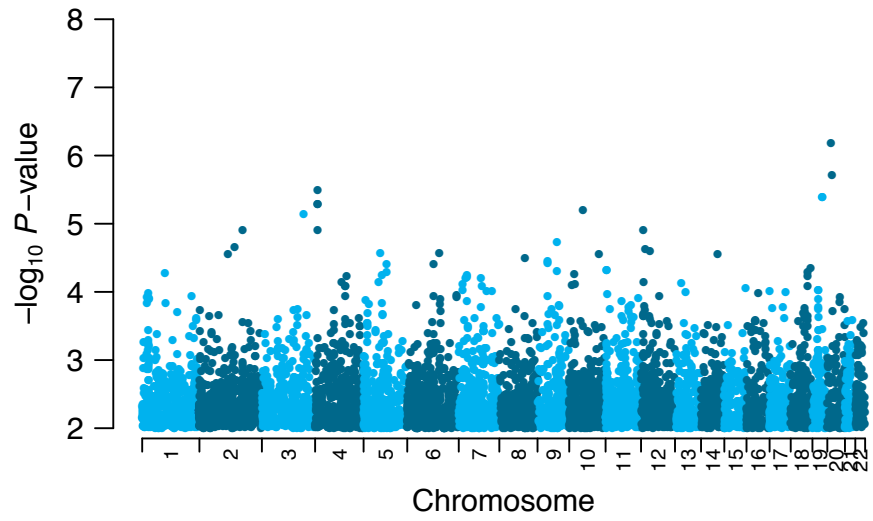

GWAS of BMI in children aged 10.5-11.5 years old.

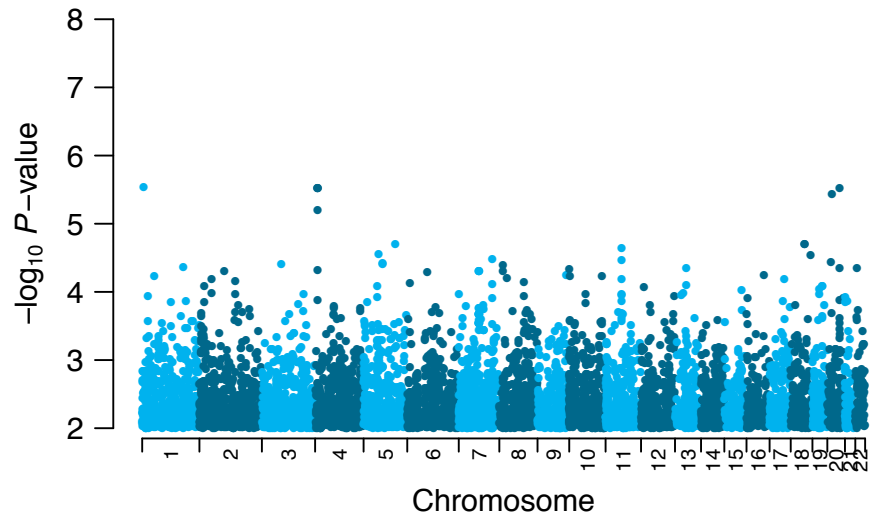

GWAS of BMI in children aged 11.5-12.5 years old.

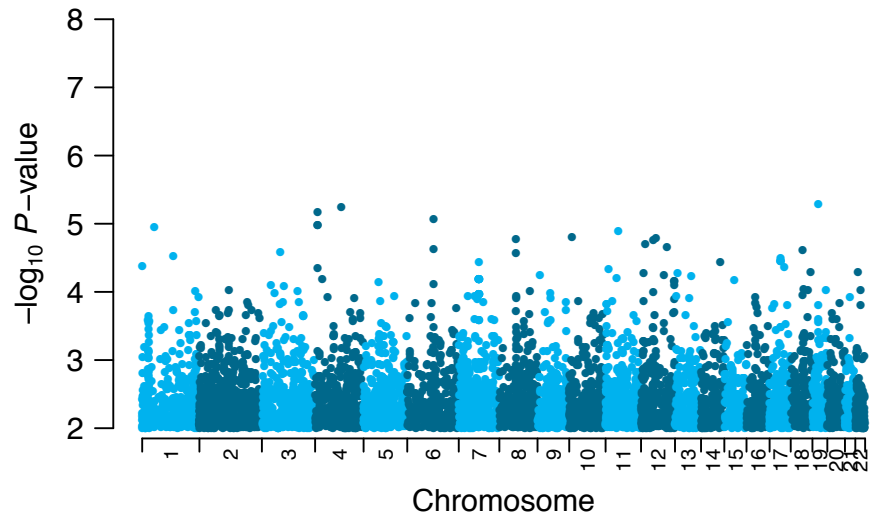

GWAS of BMI in children aged 12.5-13.5 years old.

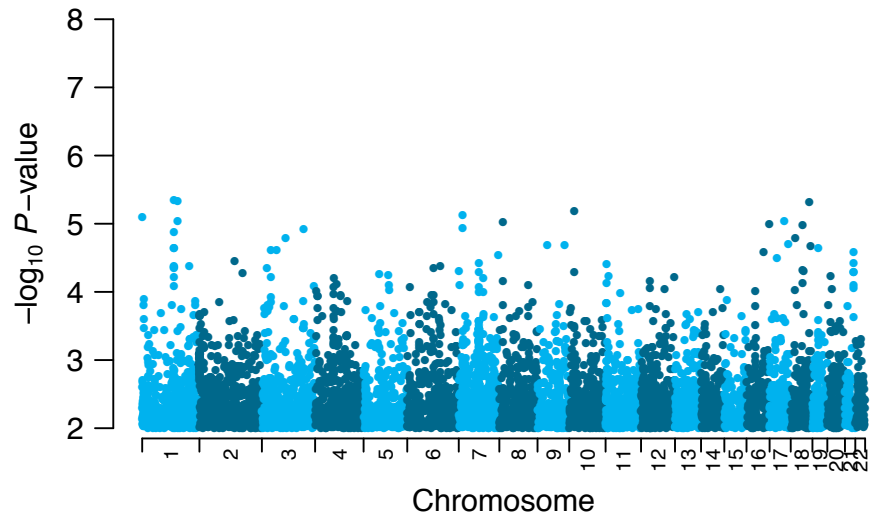

GWAS of BMI in children aged 13.5-14.5 years old.

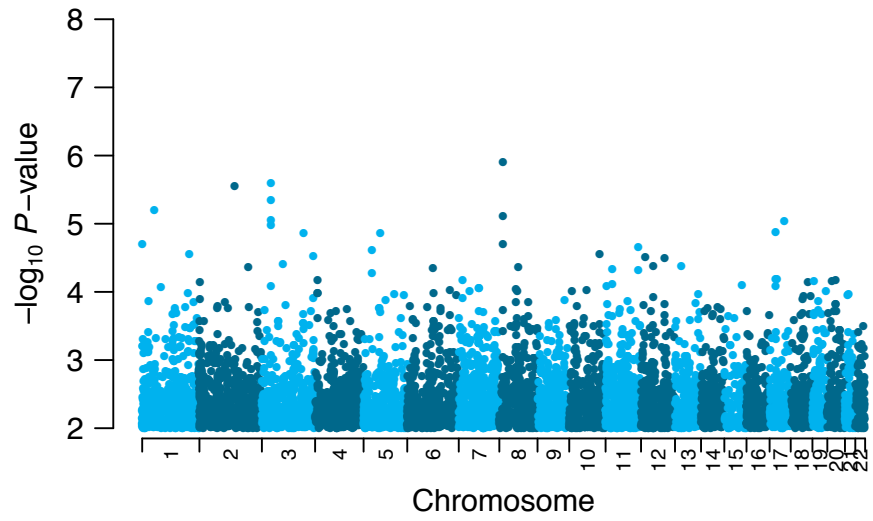

GWAS of BMI in children aged 14.5-15.5 years old.



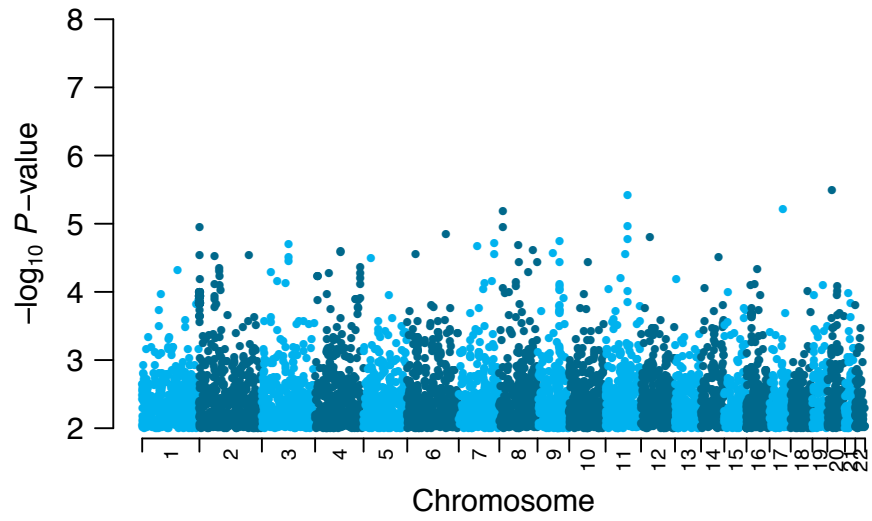

GWAS of BMI in children aged 15.5-16.5 years old.

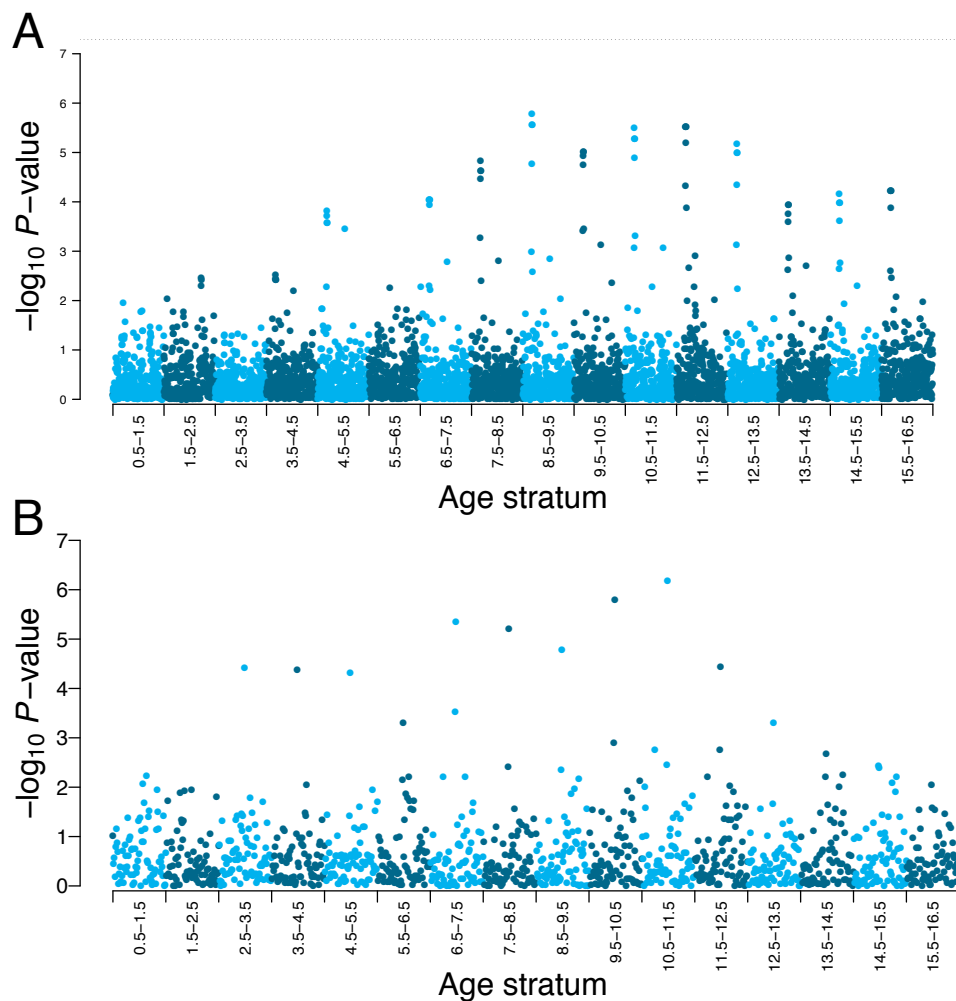

**Trajectories of association peaks from chromosomes 4 and 20 along age strata.** A: Chromosome 4. The strongest association corresponds to the *rs12501266* variant of gene *SORCS2*. Shown is the region with physical coordinates 4:7440183-7310183. B: Chromosome 20. The strongest association corresponds to the *rs474169* variants of gene *SNAP25-AS1*. The region shown has physical coordinates 20:10016800-10181800.

**S19 Fig. Longitudinal GWAS of BMI.** Manhattan plot showing genome-wide association  $P$ -values represented as  $-\log_{10} P\text{-value}$ .

S20 Fig.

537

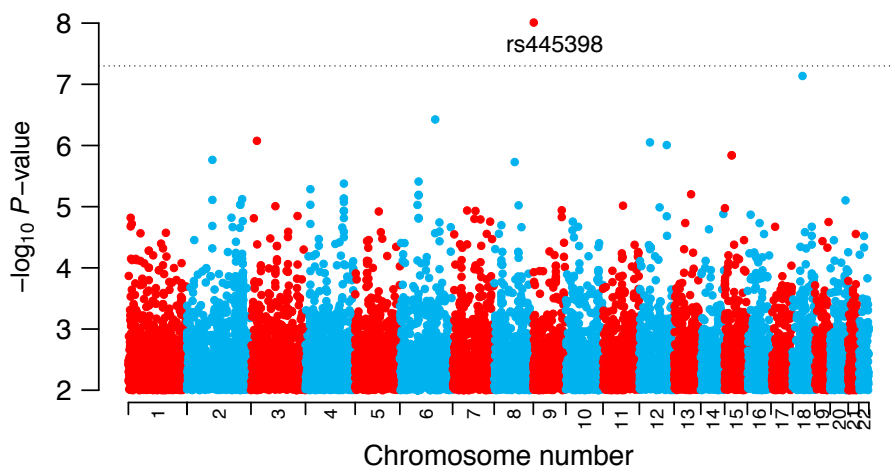

**GWAS of Age-AR.** Manhattan plot showing genome-wide association  $P$ -values represented as  $-\log_{10} P$ -value. Variants achieving the genome wide threshold of  $P < 5 \times 10^{-8}$  are labeled.

538  
539  
540  
541

S21 Fig.

542

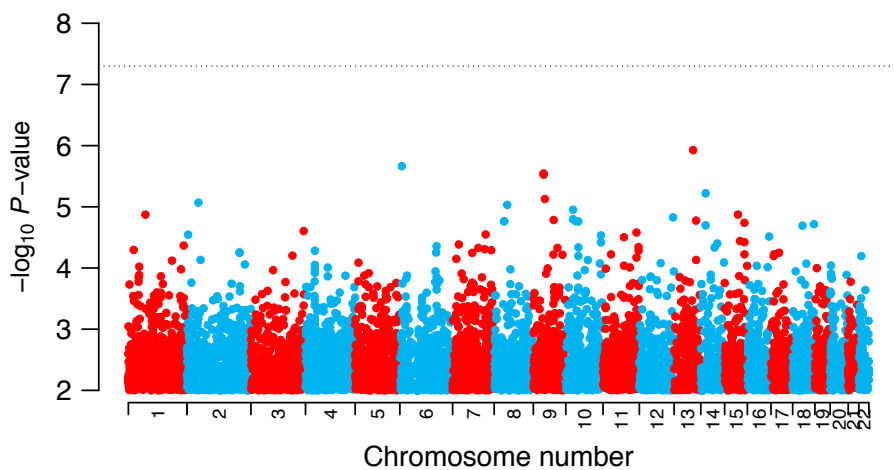

**GWAS of BMI-AR.** Manhattan plot showing genome-wide association  $P$ -values represented as  $-\log_{10} P$ -value.

543  
544  
545

S1 Table.

546

| Age stratum | Sample size | BMI Mapuche | BMI European | P-value | Lambda |
|-------------|-------------|-------------|--------------|---------|--------|
| 0.5-1.5     | 718         | 17.96       | 17.64        | 0.5888  | -1.0   |
| 1.5-2.5     | 684         | 17.32       | 16.68        | 0.2778  | -1.3   |
| 2.5-3.5     | 504         | 17.25       | 16.17        | 0.1405  | -1.6   |
| 3.5-4.5     | 642         | 17.28       | 16.23        | 0.1366  | -2.0   |
| 4.5-5.5     | 788         | 17.33       | 16.08        | 0.0628  | -2.0   |
| 5.5-6.5     | 483         | 18.44       | 15.69        | 0.0058  | -1.8   |
| 6.5-7.5     | 803         | 18.72       | 16.20        | 0.0063  | -1.7   |
| 7.5-8.5     | 829         | 19.76       | 16.61        | 0.0019  | -1.4   |
| 8.5-9.5     | 828         | 20.52       | 17.44        | 0.0119  | -1.0   |
| 9.5-10.5    | 841         | 21.67       | 17.98        | 0.0037  | -0.6   |
| 10.5-11.5   | 795         | 22.88       | 18.47        | 0.0013  | -0.5   |
| 11.5-12.5   | 667         | 24.19       | 18.57        | 0.0004  | -0.7   |
| 12.5-13.5   | 748         | 24.64       | 19.86        | 0.0030  | -0.7   |
| 13.5-14.5   | 782         | 26.16       | 19.86        | 0.0002  | -1.1   |
| 14.5-15.5   | 780         | 26.46       | 20.61        | 0.0006  | -1.1   |
| 15.5-16.5   | 587         | 26.88       | 21.00        | 0.0022  | -1.1   |

**BMI**

547

**estimation by age stratum in Mapuche and European individuals.** Shown are the age stratum; number of individuals; estimated BMI among Mapuche; estimated BMI among Europeans; association  $P$ -values between BMI and Mapuche global ancestry;  $\lambda$  used in Box-Cox transformations for each age stratum.

548

549

550

551

S2 Table.

552

| SNP ID-Allele       | Location    | Consequence | Gene            | $\beta$ -GT | $P$ -GT |
|---------------------|-------------|-------------|-----------------|-------------|---------|
| <i>rs35266519-T</i> | 17:38062390 | missense    | <i>GSDMB</i>    | 0.26        | 2.9E-07 |
| <i>rs74008771-G</i> | 15:37046787 | intron      | <i>C15orf41</i> | 0.31        | 3.2E-07 |
| <i>rs4655426-T</i>  | 1:215893063 | intron      | <i>USH2A</i>    | -0.04       | 9.8E-07 |
| <i>rs78375444-G</i> | 13:35905127 | intron      | <i>NBEA</i>     | 0.20        | 1.1E-06 |
| <i>rs78982354-G</i> | 14:39702615 | upstream    | <i>MIA2</i>     | 0.28        | 2.1E-06 |
| <i>rs79316274-C</i> | 13:57529593 | intergenic  | -               | 0.12        | 2.4E-06 |
| <i>rs75032037-T</i> | 13:57426033 | intergenic  | -               | 0.11        | 2.8E-06 |
| <i>rs11545026-T</i> | 15:57842525 | 3' UTR      | <i>CGNL1</i>    | 0.11        | 3.6E-06 |
| <i>rs1058511-A</i>  | 19:55859439 | 3' UTR      | <i>SUV420H2</i> | -0.03       | 5.4E-06 |
| <i>rs6914843-G</i>  | 6:30894837  | downstream  | <i>VAR2</i>     | 0.40        | 5.4E-06 |

553

554

555

556

557

**Strongest associations in the GWAS for longitudinal BMI.** Shown is the SNP rs ID with the associated allele, physical position in the chromosome, consequence type, gene, effect size of the genotype ( $\beta_{GT}$ ) with the corresponding association  $P$ -value ( $P_{GT}$ ), and the frequency of the associated allele.

S3 Table.

558

| SNP ID-Allele        | Location    | Consequence | Gene              | $\beta$ -GTxSex | P-GTxSex | Frequency |
|----------------------|-------------|-------------|-------------------|-----------------|----------|-----------|
| <i>rs2183606-G</i>   | 13:92804506 | intron      | <i>GPC5</i>       | -4.90           | 1.2E-06  | 0.453     |
| <i>rs6926791-A</i>   | 6:5169584   | intron      | <i>LYRM4</i>      | 4.78            | 2.2E-06  | 0.040     |
| <i>rs10812580-A</i>  | 9:27383756  | intron      | <i>MOB3B</i>      | 4.72            | 2.9E-06  | 0.259     |
| <i>rs13283804-G</i>  | 9:27391922  | intron      | <i>MOB3B</i>      | 4.71            | 3.0E-06  | 0.284     |
| <i>rs76077232-C</i>  | 14:34930273 | intron      | <i>SPTSSA</i>     | 4.56            | 6.0E-06  | 0.013     |
| <i>rs141739085-C</i> | 9:32332364  | downstream  | <i>SLC25A5P8</i>  | 4.52            | 7.4E-06  | 0.137     |
| <i>rs1464005-A</i>   | 2:34238100  | intron/NCT  | <i>AC009499.1</i> | -4.49           | 8.5E-06  | 0.346     |
| <i>rs73230790-A</i>  | 8:31052352  | intergenic  | -                 | -4.47           | 9.3E-06  | 0.220     |

**Strongest associations for BMI-AR GWAS.** Shown is the SNP rs ID with the associated allele, physical position in the chromosome, consequence type, gene, effect size of the interaction between genotype and sex ( $\beta_{GTxSex}$ ) with the corresponding association  $P$ -value ( $P_{GTxSex}$ ), and the frequency of the associated allele.

559

560

561

562

563
